# Supplementary material for: Interaction Effects of Maternal Sexually Transmitted Infections with Prenatal Care Utilization Status on Preterm Birth and Low Birthweight: U.S. National Data
Source: MDPI journal article supplement (doi:10.3390/jcm11175184), 2022-09-01
Supplement: s1 [file s1]

## SUPPLEMENTARY INFORMATION

### Interaction Effects of Maternal Sexually Transmitted Infections with Prenatal Care Utilization Status on Preterm Birth and Low Birthweight: US National Data

#### Sensitivity analysis

**Table S1.** Logistic regression analyses for the interaction effects between chlamydia, gonorrhea, and syphilis infection (*Factor 1*) and prenatal care (PNC) utilization status (*Factor 2*) on preterm birth stratified by maternal age <25 years

| Maternal age <25                                      |          |                               |                           |                    |         |
|-------------------------------------------------------|----------|-------------------------------|---------------------------|--------------------|---------|
| Factor 1                                              | Factor 2 | No Preterm Birth<br>n=741,220 | Preterm Birth<br>n=67,803 |                    | p value |
|                                                       |          | n                             | n                         | aOR (95%CI)        |         |
| Chlamydia (-)                                         | PNC (-)  | 14,936                        | 4,131                     | 3.19 (3.07, 3.30)  | <.001   |
| Chlamydia (-)                                         | PNC (+)  | 690,790                       | 59,950                    | 1.00               |         |
| Chlamydia (+)                                         | PNC (-)  | 573                           | 189                       | 3.29 (2.78, 3.90)  | <.001   |
| Chlamydia (+)                                         | PNC (+)  | 34,921                        | 3,533                     | 1.03 (0.99, 1.07)  | 0.100   |
| <b>Multiplicative Interaction</b>                     |          |                               |                           | 1.01 (0.86, 1.16)  | 0.987   |
| <b>Relative Excess Risk due to Interaction (RERI)</b> |          |                               |                           | 0.07 (-0.08, 0.22) | 0.365   |
| <b>Attributable Proportion (AP)</b>                   |          |                               |                           | 0.02 (-0.13, 0.17) | 0.792   |
| <b>Synergy Index (SI)</b>                             |          |                               |                           | 1.03 (0.88, 1.18)  | 0.690   |
| Gonorrhea (-)                                         | PNC (-)  | 15,379                        | 4,271                     | 3.18 (3.07, 3.30)  | <.001   |
| Gonorrhea (-)                                         | PNC (+)  | 720,448                       | 62,882                    | 1.00               |         |
| Gonorrhea (+)                                         | PNC (-)  | 130                           | 49                        | 3.58 (2.56, 5.02)  | <.001   |
| Gonorrhea (+)                                         | PNC (+)  | 5,263                         | 601                       | 1.07 (0.98, 1.16)  | 0.137   |
| <b>Multiplicative Interaction</b>                     |          |                               |                           | 1.05 (0.78, 1.41)  | 0.762   |
| <b>Relative Excess Risk due to Interaction (RERI)</b> |          |                               |                           | 0.33 (0.04, 0.62)  | 0.027   |
| <b>Attributable Proportion (AP)</b>                   |          |                               |                           | 0.09 (-0.20, 0.38) | 0.548   |
| <b>Synergy Index (SI)</b>                             |          |                               |                           | 1.15 (0.85, 1.43)  | 0.308   |
| Syphilis (-)                                          | PNC (-)  | 15,454                        | 4,297                     | 3.18 (3.07, 3.30)  | <.001   |
| Syphilis (-)                                          | PNC (+)  | 724,379                       | 63,305                    | 1.00               |         |
| Syphilis (+)                                          | PNC (-)  | 55                            | 23                        | 4.36 (2.66, 7.15)  | <.001   |
| Syphilis (+)                                          | PNC (+)  | 1,332                         | 178                       | 1.25 (1.06, 1.47)  | 0.006   |
| <b>Multiplicative Interaction</b>                     |          |                               |                           | 1.10 (0.71, 1.69)  | 0.726   |
| <b>Relative Excess Risk due to Interaction (RERI)</b> |          |                               |                           | 0.93 (0.49, 1.36)  | <.001   |
| <b>Attributable Proportion (AP)</b>                   |          |                               |                           | 0.21 (-0.22, 0.65) | 0.342   |
| <b>Synergy Index (SI)</b>                             |          |                               |                           | 1.38 (0.95, 1.82)  | 0.050   |

n: number; aOR: adjusted odds ratio; CI: confidence interval; PNC (+): prenatal care adequate; PNC (-): prenatal care inadequate; Adjusted for: race/ethnicity, education, marital status, health insurance, parity, prior preterm birth, gestational diabetes, gestational hypertension, smoking, and infant sex; RERI: Relative Excess Risk due to Interaction; AP: Attributable Proportion; SI: Synergy Index

**Table S2.** Logistic regression analyses for the interaction effects between chlamydia, gonorrhea, and syphilis infection (*Factor 1*) and prenatal care (PNC) utilization status (*Factor 2*) on preterm birth stratified by maternal age  $\geq 25$

| Maternal age $\geq 25$ years old                      |          |                                 |                            |                   |         |
|-------------------------------------------------------|----------|---------------------------------|----------------------------|-------------------|---------|
| Factor 1                                              | Factor 2 | No Preterm birth<br>n=2,396,602 | Preterm birth<br>n=212,403 |                   | p value |
|                                                       |          | n                               | n                          | aOR (95%CI)       |         |
| Chlamydia (-)                                         | PNC (-)  | 30,191                          | 8,868                      | 3.05 (2.98, 3.13) | <.001   |
| Chlamydia (-)                                         | PNC (+)  | 2,343,939                       | 200,780                    | 1.00              |         |
| Chlamydia (+)                                         | PNC (-)  | 431                             | 195                        | 3.59 (3.01, 4.29) | <.001   |
| Chlamydia (+)                                         | PNC (+)  | 22,041                          | 2,560                      | 0.98 (0.94, 1.02) | 0.413   |
| <b>Multiplicative Interaction</b>                     |          |                                 |                            | 1.20 (1.03, 1.39) | 0.046   |
| <b>Relative Excess Risk due to Interaction (RERI)</b> |          |                                 |                            | 0.56 (0.41, 0.71) | <.001   |
| <b>Attributable Proportion (AP)</b>                   |          |                                 |                            | 0.15 (0.01, 0.30) | 0.040   |
| <b>Synergy Index (SI)</b>                             |          |                                 |                            | 1.27 (1.12, 1.42) | <.001   |
| Gonorrhea (-)                                         | PNC (-)  | 30,499                          | 8,961                      | 3.05 (2.97, 3.13) | <.001   |
| Gonorrhea (-)                                         | PNC (+)  | 2,361,931                       | 202,744                    | 1.00              |         |
| Gonorrhea (+)                                         | PNC (-)  | 123                             | 102                        | 6.15 (4.66, 8.10) | <.001   |
| Gonorrhea (+)                                         | PNC (+)  | 4,049                           | 596                        | 1.15 (1.05, 1.25) | 0.002   |
| <b>Multiplicative Interaction</b>                     |          |                                 |                            | 1.75 (1.31, 2.35) | 0.034   |
| <b>Relative Excess Risk due to Interaction (RERI)</b> |          |                                 |                            | 2.95 (2.66, 3.24) | <.001   |
| <b>Attributable Proportion (AP)</b>                   |          |                                 |                            | 0.48 (0.19, 0.77) | 0.001   |
| <b>Synergy Index (SI)</b>                             |          |                                 |                            | 2.34 (2.05, 2.63) | <.001   |
| Syphilis (-)                                          | PNC (-)  | 30,522                          | 8,992                      | 3.06 (2.98, 3.13) | <.001   |
| Syphilis (-)                                          | PNC (+)  | 2,363,212                       | 202,883                    | 1.00              |         |
| Syphilis (+)                                          | PNC (-)  | 100                             | 71                         | 6.00 (4.36, 8.26) | <.001   |
| Syphilis (+)                                          | PNC (+)  | 2,768                           | 457                        | 1.33 (1.20, 1.47) | <.001   |
| <b>Multiplicative Interaction</b>                     |          |                                 |                            | 1.47 (0.95, 2.28) | 0.253   |
| <b>Relative Excess Risk due to Interaction (RERI)</b> |          |                                 |                            | 2.61 (2.17, 3.04) | <.001   |
| <b>Attributable Proportion (AP)</b>                   |          |                                 |                            | 0.43 (0.00, 0.87) | 0.049   |
| <b>Synergy Index (SI)</b>                             |          |                                 |                            | 2.09 (1.66, 2.53) | <.001   |

n: number; aOR: adjusted odds ratio; CI: confidence interval; PNC (+): prenatal care adequate; PNC (-): prenatal care inadequate; Adjusted for: race/ethnicity, education, marital status, health insurance, parity, prior preterm birth, gestational diabetes, gestational hypertension, smoking, and infant sex; RERI: Relative Excess Risk due to Interaction; AP: Attributable Proportion; SI: Synergy Index

**Table S3.** Logistic regression analyses for the interaction effects between chlamydia, gonorrhea, and syphilis (*Factor 1*) and prenatal care (PNC) utilization status (*Factor 2*) on low birthweight stratified by maternal age <25 years

| Maternal age <25                                      |          |                                 |                             |                    |         |
|-------------------------------------------------------|----------|---------------------------------|-----------------------------|--------------------|---------|
| Factor 1                                              | Factor 2 | No low birthweight<br>n=749,038 | Low birthweight<br>n=59,985 |                    | p value |
|                                                       |          | n                               | n                           | aOR (95%CI)        |         |
| Chlamydia (-)                                         | PNC (-)  | 15,977                          | 3,090                       | 2.38 (2.29, 2.48)  | <.001   |
| Chlamydia (-)                                         | PNC (+)  | 697,524                         | 53,216                      | 1.00               |         |
| Chlamydia (+)                                         | PNC (-)  | 614                             | 148                         | 2.49 (2.07, 3.00)  | <.001   |
| Chlamydia (+)                                         | PNC (+)  | 34,923                          | 3,531                       | 1.06 (1.02, 1.10)  | 0.001   |
| <b>Multiplicative Interaction</b>                     |          |                                 |                             | 0.99 (0.83, 1.17)  | 0.886   |
| <b>Relative Excess Risk due to Interaction (RERI)</b> |          |                                 |                             | 0.05 (-0.11, 0.22) | 0.572   |
| <b>Attributable Proportion (AP)</b>                   |          |                                 |                             | 0.02 (-0.15, 0.19) | 0.826   |
| <b>Synergy Index (SI)</b>                             |          |                                 |                             | 1.03 (0.87, 1.20)  | 0.696   |
| Gonorrhea (-)                                         | PNC (-)  | 16,454                          | 3,196                       | 2.38 (2.28, 2.48)  | <.001   |
| Gonorrhea (-)                                         | PNC (+)  | 727,237                         | 56,093                      | 1.00               |         |
| Gonorrhea (+)                                         | PNC (-)  | 137                             | 42                          | 2.85 (2.00, 4.07)  | <.001   |
| Gonorrhea (+)                                         | PNC (+)  | 5,210                           | 654                         | 1.14 (1.05, 1.24)  | 0.001   |
| <b>Multiplicative Interaction</b>                     |          |                                 |                             | 1.05 (0.77, 1.44)  | 0.786   |
| <b>Relative Excess Risk due to Interaction (RERI)</b> |          |                                 |                             | 0.33 (0.02, 0.64)  | 0.039   |
| <b>Attributable Proportion (AP)</b>                   |          |                                 |                             | 0.11 (-0.20, 0.43) | 0.479   |
| <b>Synergy Index (SI)</b>                             |          |                                 |                             | 1.29 (0.98, 1.61)  | 0.051   |
| Syphilis (-)                                          | PNC (-)  | 16,532                          | 3,219                       | 2.38 (2.28, 2.47)  | <.001   |
| Syphilis (-)                                          | PNC (+)  | 731,123                         | 56,561                      | 1.00               |         |
| Syphilis (+)                                          | PNC (-)  | 59                              | 19                          | 3.43 (2.02, 5.82)  | <.001   |
| Syphilis (+)                                          | PNC (+)  | 1,324                           | 186                         | 1.35 (1.15, 1.57)  | <.001   |
| <b>Multiplicative Interaction</b>                     |          |                                 |                             | 1.07 (0.66, 1.71)  | 0.818   |
| <b>Relative Excess Risk due to Interaction (RERI)</b> |          |                                 |                             | 0.70 (0.23, 1.17)  | 0.003   |
| <b>Attributable Proportion (AP)</b>                   |          |                                 |                             | 0.20 (-0.27, 0.68) | 0.405   |
| <b>Synergy Index (SI)</b>                             |          |                                 |                             | 1.40 (0.93, 1.88)  | 0.057   |

n: number; aOR: adjusted odds ratio; CI: confidence interval; PNC (+): prenatal care adequate; PNC (-): prenatal care inadequate; Adjusted for: race/ethnicity, education, marital status, health insurance, parity, prior preterm birth, gestational diabetes, gestational hypertension, smoking, and infant sex; RERI: Relative Excess Risk due to Interaction; AP: Attributable Proportion; SI: Synergy Index

**Table S4.** Logistic regression analyses for the interaction between chlamydia, gonorrhea, and syphilis infection (*Factor 1*) and prenatal care (PNC) utilization status (*Factor 2*) on low birthweight stratified by maternal age  $\geq 25$

| Maternal age $\geq 25$ years old                      |          |                                   |         |                              |         |
|-------------------------------------------------------|----------|-----------------------------------|---------|------------------------------|---------|
| Factor 1                                              | Factor 2 | No Low birthweight<br>n=2,447,730 |         | Low birthweight<br>n=161,275 | p value |
|                                                       |          | n                                 | n       | aOR (95%CI)                  |         |
| Chlamydia (-)                                         | PNC (-)  | 32,534                            | 6,525   | 2.50 (2.43, 2.57)            | <.001   |
| Chlamydia (-)                                         | PNC (+)  | 2,392,279                         | 152,440 | 1.00                         |         |
| Chlamydia (+)                                         | PNC (-)  | 470                               | 156     | 2.83 (2.34, 3.42)            | <.001   |
| Chlamydia (+)                                         | PNC (+)  | 22,447                            | 2,154   | 0.98 (0.94, 1.03)            | 0.382   |
| <b>Multiplicative Interaction</b>                     |          |                                   |         | 1.05 (0.89, 1.23)            | 0.606   |
| <b>Relative Excess Risk due to Interaction (RERI)</b> |          |                                   |         | 0.35 (0.18, 0.51)            | <.001   |
| <b>Attributable Proportion (AP)</b>                   |          |                                   |         | 0.12 (-0.04, 0.29)           | 0.416   |
| <b>Synergy Index (SI)</b>                             |          |                                   |         | 1.24 (1.07, 1.40)            | 0.001   |
| Gonorrhea (-)                                         | PNC (-)  | 32,858                            | 6,602   | 2.49 (2.42, 2.57)            | <.001   |
| Gonorrhea (-)                                         | PNC (+)  | 2,410,589                         | 154,086 | 1.00                         |         |
| Gonorrhea (+)                                         | PNC (-)  | 146                               | 79      | 4.09 (3.07, 5.47)            | <.001   |
| Gonorrhea (+)                                         | PNC (+)  | 4,137                             | 508     | 1.08 (0.99, 1.19)            | 0.094   |
| <b>Multiplicative Interaction</b>                     |          |                                   |         | 1.52 (1.20, 1.93)            | 0.024   |
| <b>Relative Excess Risk due to Interaction (RERI)</b> |          |                                   |         | 1.52 (1.28, 1.76)            | <.001   |
| <b>Attributable Proportion (AP)</b>                   |          |                                   |         | 0.37 (0.13, 0.61)            | 0.002   |
| <b>Synergy Index (SI)</b>                             |          |                                   |         | 1.97 (1.07, 1.40)            | <.001   |
| Syphilis (-)                                          | PNC (-)  | 32,877                            | 6,637   | 2.50 (2.43, 2.57)            | <.001   |
| Syphilis (-)                                          | PNC (+)  | 2,411,888                         | 154,207 | 1.00                         |         |
| Syphilis (+)                                          | PNC (-)  | 127                               | 44      | 3.03 (2.10, 4.35)            | <.001   |
| Syphilis (+)                                          | PNC (+)  | 2,838                             | 387     | 1.30 (1.16, 1.45)            | <.001   |
| <b>Multiplicative Interaction</b>                     |          |                                   |         | 0.93 (0.68, 1.27)            | 0.655   |
| <b>Relative Excess Risk due to Interaction (RERI)</b> |          |                                   |         | 0.23 (-0.08, 0.54)           | 0.150   |
| <b>Attributable Proportion (AP)</b>                   |          |                                   |         | 0.07 (-0.24, 0.39)           | 0.647   |
| <b>Synergy Index (SI)</b>                             |          |                                   |         | 1.13 (0.81, 1.44)            | 0.415   |

n: number; aOR: adjusted odds ratio; CI: confidence interval; PNC (+): prenatal care adequate; PNC (-): prenatal care inadequate; Adjusted for: race/ethnicity, education, marital status, health insurance, parity, prior preterm birth, gestational diabetes,

gestational hypertension, smoking, and infant sex; RERI: Relative Excess Risk due to Interaction; AP: Attributable Proportion; SI: Synergy Index

**Table S5.** Inconsistencies in the interaction analyses on preterm birth before the PNC variable was recoded as a risk factor

| Factor 1                                              | Factor 2       | No Preterm birth | Preterm birth | <i>p</i> value              |
|-------------------------------------------------------|----------------|------------------|---------------|-----------------------------|
|                                                       |                | n                | n             | aOR (95%CI)                 |
| <b>Chlamydia (-)</b>                                  | <b>PNC (-)</b> | <b>45,127</b>    | <b>12,999</b> | <b>1.00</b>                 |
| Chlamydia (-)                                         | PNC (+)        | 3,034,729        | 260,730       | 0.32 (0.31, 0.33)           |
| Chlamydia (+)                                         | PNC (-)        | 1,004            | 384           | 1.14 (1.01, 1.29)           |
| Chlamydia (+)                                         | PNC (+)        | 56,962           | 6,093         | 0.33 (0.32, 0.34)           |
| <b>Multiplicative Interaction</b>                     |                |                  |               | <b>0.92 (0.83, 1.02)</b>    |
| <b>Relative Excess Risk due to Interaction (RERI)</b> |                |                  |               | <b>-0.13 (-0.23, -0.02)</b> |
| <b>Attributable Proportion (AP)</b>                   |                |                  |               | <b>-0.39 (-0.49, -0.28)</b> |
| <b>Synergy Index (SI)</b>                             |                |                  |               | <b>1.24 (1.13, 1.34)</b>    |
| Gonorrhea (-)                                         | PNC (-)        | 45,878           | 13,232        | 1.00                        |
| Gonorrhea (-)                                         | PNC (+)        | 3,082,379        | 265,626       | 0.32 (0.31, 0.33)           |
| Gonorrhea (+)                                         | PNC (-)        | 253              | 151           | 1.63 (1.32, 2.01)           |
| Gonorrhea (+)                                         | PNC (+)        | 9,312            | 1,197         | 0.36 (0.34, 0.38)           |
| <b>Multiplicative Interaction</b>                     |                |                  |               | <b>0.69 (0.58, 0.82)</b>    |
| <b>Relative Excess Risk due to Interaction (RERI)</b> |                |                  |               | <b>-0.59 (-0.76, -0.41)</b> |
| <b>Attributable Proportion (AP)</b>                   |                |                  |               | <b>-1.64 (-1.81, -1.47)</b> |
| <b>Synergy Index (SI)</b>                             |                |                  |               | <b>12.80 (12.60, 13.10)</b> |
| Syphilis (-)                                          | PNC (-)        | 45,976           | 13,289        | 1.00                        |
| Syphilis (-)                                          | PNC (+)        | 3,087,591        | 266,188       | 0.32 (0.32, 0.33)           |
| Syphilis (+)                                          | PNC (-)        | 155              | 94            | 1.78 (1.36, 2.32)           |
| Syphilis (+)                                          | PNC (+)        | 4,100            | 635           | 0.42 (0.38, 0.46)           |
| <b>Multiplicative Interaction</b>                     |                |                  |               | <b>0.79 (0.64, 0.98)</b>    |
| <b>Relative Excess Risk due to Interaction (RERI)</b> |                |                  |               | <b>-0.68 (-0.90, -0.46)</b> |
| <b>Attributable Proportion (AP)</b>                   |                |                  |               | <b>-1.62 (-1.84, -1.40)</b> |
| <b>Synergy Index (SI)</b>                             |                |                  |               | <b>-5.80 (-6.00, -5.60)</b> |

n: number; aOR: adjusted odds ratio; CI: confidence interval; PNC (+): prenatal care adequate; PNC (-): prenatal care inadequate; Adjusted for: race/ethnicity, age, education, marital status, health insurance, parity, prior preterm birth, gestational diabetes, gestational hypertension, smoking, and infant sex; RERI: Relative Excess

Risk due to Interaction; AP: Attributable Proportion; SI: Synergy Index ;  
inconsistencies marked in bold

**Table S6.** Inconsistencies in the interaction analyses on low birthweight before the PNC variable as recoded a risk factor

| Factor 1                                              | Factor 2       | No Low<br>birthweight | Low birthweight | <i>p</i> value              |       |
|-------------------------------------------------------|----------------|-----------------------|-----------------|-----------------------------|-------|
|                                                       |                | n                     | n               | aOR (95%CI)                 |       |
| <b>Chlamydia (-)</b>                                  | <b>PNC (-)</b> | <b>48,511</b>         | <b>9,615</b>    | <b>1.00</b>                 |       |
| Chlamydia (-)                                         | PNC (+)        | 3,089,803             | 205,656         | 0.40 (0.39, 0.41)           | <.001 |
| Chlamydia (+)                                         | PNC (-)        | 1,084                 | 304             | 1.12 (0.97, 1.28)           | 0.112 |
| Chlamydia (+)                                         | PNC (+)        | 57,370                | 5,685           | 0.42 (0.40, 0.43)           | <.001 |
| <b>Multiplicative Interaction</b>                     |                |                       |                 | <b>0.94 (0.82, 1.05)</b>    | 0.331 |
| <b>Relative Excess Risk due to Interaction (RERI)</b> |                |                       |                 | <b>-0.10 (-0.21, 0.01)</b>  | 0.074 |
| <b>Attributable Proportion (AP)</b>                   |                |                       |                 | <b>-0.24 (-0.35, -0.12)</b> | <.001 |
| <b>Synergy Index (SI)</b>                             |                |                       |                 | <b>1.21 (1.09, 1.32)</b>    | <.001 |
| Gonorrhea (-)                                         | PNC (-)        | 49,312                | 9,798           | 1.00                        |       |
| Gonorrhea (-)                                         | PNC (+)        | 3,137,826             | 210,179         | 0.40 (0.39, 0.41)           | <.001 |
| Gonorrhea (+)                                         | PNC (-)        | 283                   | 121             | 1.47 (1.18, 1.84)           | <.001 |
| Gonorrhea (+)                                         | PNC (+)        | 9,347                 | 1,162           | 0.46 (0.43, 0.49)           | <.001 |
| <b>Multiplicative Interaction</b>                     |                |                       |                 | <b>0.78 (0.59, 0.97)</b>    | 0.049 |
| <b>Relative Excess Risk due to Interaction (RERI)</b> |                |                       |                 | <b>-0.41 (-0.60, -0.22)</b> | <.001 |
| <b>Attributable Proportion (AP)</b>                   |                |                       |                 | <b>-0.89 (-1.08, -0.70)</b> | <.001 |
| <b>Synergy Index (SI)</b>                             |                |                       |                 | <b>4.15 (3.96, 4.34)</b>    | <.001 |
| Syphilis (-)                                          | PNC (-)        | 49,409                | 9856            | 1.00                        |       |
| Syphilis (-)                                          | PNC (+)        | 3,143,011             | 210,768         | 0.40 (0.39, 0.41)           | <.001 |
| Syphilis (+)                                          | PNC (-)        | 186                   | 63              | 1.30 (0.96, 1.76)           | 0.088 |
| Syphilis (+)                                          | PNC (+)        | 4,162                 | 573             | 0.53 (0.48, 0.58)           | <.001 |
| <b>Multiplicative Interaction</b>                     |                |                       |                 | <b>1.02 (0.76, 1.28)</b>    | 0.890 |
| <b>Relative Excess Risk due to Interaction (RERI)</b> |                |                       |                 | <b>-0.17 (-0.43, 0.09)</b>  | 0.201 |
| <b>Attributable Proportion (AP)</b>                   |                |                       |                 | <b>-0.32 (-0.58, -0.06)</b> | 0.015 |
| <b>Synergy Index (SI)</b>                             |                |                       |                 | <b>1.57 (1.30, 1.83)</b>    | <.001 |

n: number; aOR: adjusted odds ratio; CI: confidence interval; PNC (+): prenatal care adequate; PNC (-): prenatal care inadequate; Adjusted for: race/ethnicity, age,

education, marital status, health insurance, parity, prior preterm birth, gestational diabetes, gestational hypertension, smoking, and infant sex; **inconsistencies marked in bold**
